# Supplementary material
Source: MDPI journal article supplement (https://www.mdpi.com/2409-515X/7/3/47)
Supplement: s1 [file s1]

## Supplementary Materials:

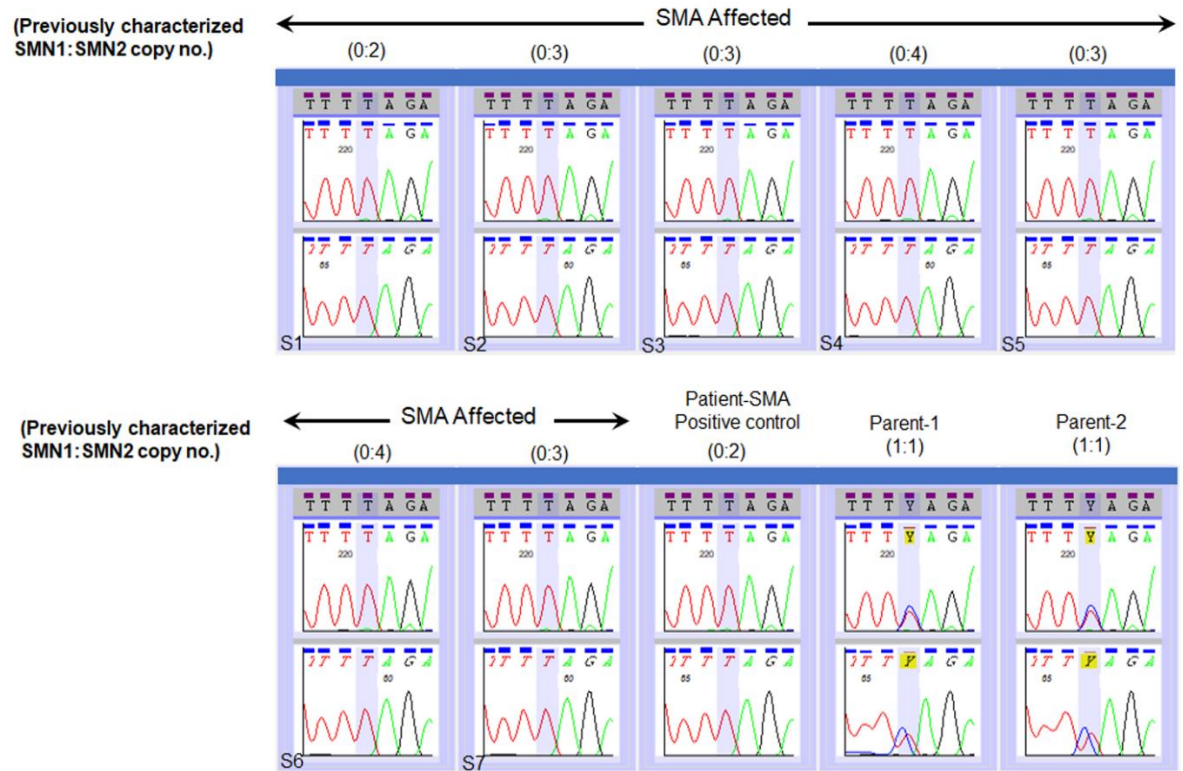

**Figure S1:** Genotype confirmation on the specimens subjected for *SMN2* copy validation. Specimens subjected to the validation study for *SMN2* copy were first confirmed for their genotype using Sanger sequencing as described in methods.

|                                             |         |         |         |               |
|---------------------------------------------|---------|---------|---------|---------------|
| (Previous characterized SMN1:SMN2 copy no.) | (0:2)   | (0:3)   | (0:3)   | (0:4)         |
| Average Copy number by new assay            | (0:1.9) | (0:2.8) | (0:3.2) | (0:4 or more) |

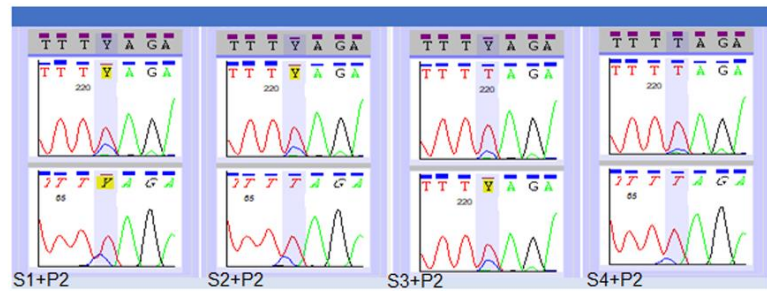

|                                             |         |               |         |         |
|---------------------------------------------|---------|---------------|---------|---------|
| (Previous characterized SMN1:SMN2 copy no.) | (0:3)   | (0:4)         | (0:3)   | (0:2)   |
| Average Copy number by new assay            | (0:3.2) | (0:4 or more) | (0:2.8) | (0:1.9) |

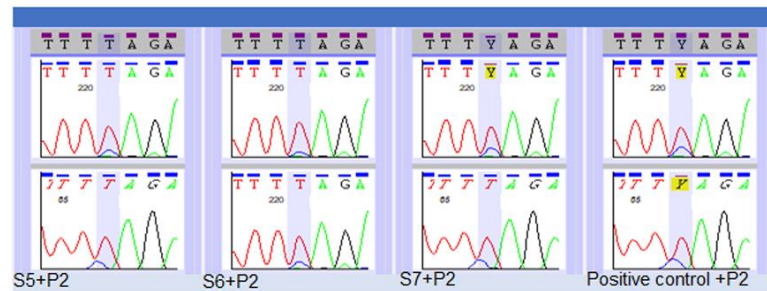

**Figure S2:** Determination of *SMN2* copy number assay validation using SMA affected specimens using another spike DNA (parent 2). DNA from SMA affected specimens and a Coriell DNA (positive control) were mixed in equal concentration with spike DNA, and bidirectional sequencing was performed. *SMN1* gene sequence used as reference sequence, and data were analyzed for determine the *SMN2* copy number in the test specimens as described in the methods section.
